# Supplementary material for: Genomic characterization and phylogenetic analysis of the first SARS-CoV-2 variants introduced in Lebanon
Source: PubMed Central journal article supplement (PMC8447710; doi:10.7717/peerj.11015), 2021-03-16

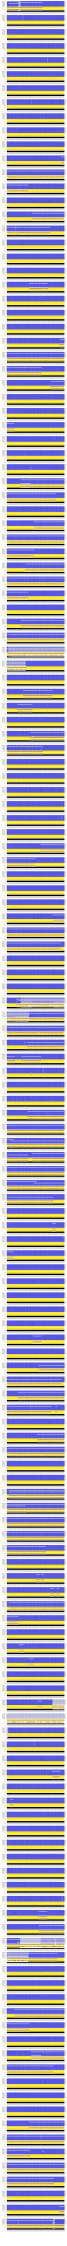

Supplement: peerj-09-11015-s001.pdf [file peerj-09-11015-s001.pdf]
