# Supplementary material for: Genomic characterization and phylogenetic analysis of the first SARS-CoV-2 variants introduced in Lebanon
Source: PubMed Central journal article supplement (PMC8447710; doi:10.7717/peerj.11015), 2021-03-16
Supplement: peerj-09-11015-s002.pdf [file peerj-09-11015-s002.pdf]

| Isolate_name          | Accession_number | Collection_Date | Location  | Travel_History | Lineage |
|-----------------------|------------------|-----------------|-----------|----------------|---------|
| HGRC-2-2162           | EPI_ISL_437512   | 2020-03-26      | Iran      | Unknown        | B.4     |
| KHGRC-2-2162          | EPI_ISL_442044   | 2020-03-26      | Iran      | Unknown        | B.4     |
| KHGRC-1.1-IP1-8206    | EPI_ISL_442523   | 2020-03-09      | Iran      | Unknown        | B.4     |
| BC_37_0-2             | EPI_ISL_412965   | 2020-02-16      | Canada    | Iran           | B.4     |
| L2409                 | EPI_ISL_435131   | 2020-02-25      | UAE       | Unknown        | B.4     |
| HKU-903b              | EPI_ISL_434566   | 2020-01-27      | Hong_Kong | Unknown        | B.4     |
| L6627                 | EPI_ISL_435139   | 2020-02-25      | UAE       | Unknown        | B.4     |
| IVDC-SD-001           | EPI_ISL_408482   | 2020-01-19      | China     | Unknown        | B       |
| SH0126                | EPI_ISL_416407   | 2020-02-15      | China     | Unknown        | B.4     |
| SH0070                | EPI_ISL_416373   | 2020-02-07      | China     | Unknown        | B.4     |
| HBCDC-HB-05           | EPI_ISL_412981   | 2020-01-18      | China     | Unknown        | B.4     |
| JX124                 | EPI_ISL_421260   | 2020-01-26      | China     | Unknown        | B.4     |
| SH0022                | EPI_ISL_416331   | 2020-01-30      | China     | Unknown        | B.4     |
| Bangkok-0078          | EPI_ISL_447019   | 2020-04-01      | Thailand  | Unknown        | B.4     |
| LA-NCDC-01760         | EPI_ISL_435106   | 2020-03-18      | India     | Unknown        | B.4     |
| KU12                  | EPI_ISL_416458   | 2020-03-02      | Kuwait    | Iran           | B.4     |
| UN-1115               | EPI_ISL_421667   | 2020-03-10      | India     | Iran           | B.4     |
| LA-NCDC-01441         | EPI_ISL_435101   | 2020-03-15      | India     | Unknown        | B.4     |
| Norway_1380           | EPI_ISL_417484   | 2020-02-26      | Norway    | Iran           | B.4     |
| Tb-82                 | EPI_ISL_415644   | 2020-02-28      | Georgia   | Unknown        | B.4     |
| HSGM-8992             | EPI_ISL_429865   | 2020-03-18      | Turkey    | Unknown        | B.4     |
| HSGM-1468             | EPI_ISL_437312   | 2020-03-25      | Turkey    | Unknown        | B.4     |
| KU09                  | EPI_ISL_416541   | 2020-03-02      | Kuwait    | Unknown        | B.4     |
| CAMB-78BB7            | EPI_ISL_441184   | 2020-04-03      | England   | Unknown        | B.1.1   |
| PHWC-2E01B            | EPI_ISL_446047   | 2020-04-10      | Wales     | Unknown        | B.1.1   |
| OXON-ADFF9            | EPI_ISL_448654   | 2020            | England   | Unknown        | B.1.1   |
| WA-S720               | EPI_ISL_449890   | 2020-04-12      | USA       | Unknown        | B.1.1   |
| StPetersburg-R117039V | EPI_ISL_450247   | 2020-04-16      | Russia    | Unknown        | B.1.1   |
| OXON-AF09A            | EPI_ISL_448808   | 2020-04-07      | England   | Unknown        | B.1.1   |
| DHWM-03041            | EPI_ISL_417422   | 2020-03-04      | Belgium   | Unknown        | B.1.1   |
| ChVir2225             | EPI_ISL_450496   | 2020-03         | Lithuania | Unknown        | B.1.1   |
| OXON-AEFF8            | EPI_ISL_448804   | 2020-04-07      | England   | Unknown        | B.1.1   |

| Isolate_name     | Accession_number | Collection_Date | Location | Travel_History | Lineage |
|------------------|------------------|-----------------|----------|----------------|---------|
| LOM-INMI-13075-N | EPI_ISL_451309   | 2020-03-01      | Italy    | Unknown        | B.1     |
| NOR-N4427        | EPI_ISL_428367   | 2020-03-23      | France   | Unknown        | B.1     |
| Poland_1104795   | EPI_ISL_428232   | 2020-03-18      | Poland   | Unknown        | B.1     |
| UGent-64         | EPI_ISL_451175   | 2020-04-07      | Belgium  | Unknown        | B.1     |
| PA-MGSC18-04     | EPI_ISL_436473   | 2020-03-25      | USA      | Unknown        | B.1     |
| ARA-10552        | EPI_ISL_419168   | 2020-03-17      | France   | Unknown        | B.1     |
| NRC-01           | EPI_ISL_430820   | 2020-03-18      | Egypt    | Unknown        | B.1     |
| KAUST-Madinah272 | EPI_ISL_437753   | 2020-03-30      | KSA      | Unknown        | B.1     |
| CT-UW272         | EPI_ISL_418057   | 2020-03-13      | USA      | Unknown        | B.1     |
| WA-UW-1420       | EPI_ISL_423000   | 2020-03-18      | USA      | Unknown        | B.1     |
| OH_0019          | EPI_ISL_426430   | 2020-03-08      | USA      | Unknown        | B.1.255 |
| NTU08            | EPI_ISL_422411   | 2020-03-14      | Taiwan   | Egypt          | B.1     |
| ON-PHL-8751      | EPI_ISL_418345   | 2020-02         | Canada   | Unknown        | B.1     |
| KAUST-Makkah163  | EPI_ISL_437697   | 2020-04-06      | KSA      | Unknown        | B.1     |
| PA-CDC-2908      | EPI_ISL_447844   | 2020-03-08      | USA      | Unknown        | B.1     |
| CGMH-CGU-23      | EPI_ISL_444276   | 2020-03-21      | Taiwan   | Unknown        | B.1     |
| Qc-L00241292     | EPI_ISL_450316   | 2020-03-27      | Canada   | Unknown        | B.1.255 |
| NRC-03           | EPI_ISL_430819   | 2020-03-18      | Egypt    | Unknown        | B.1.246 |
| AR-ISPCH-14      | EPI_ISL_445348   | 2020-03-25      | Chile    | Unknown        | B.1     |
| CA-SCCPHD-UC104  | EPI_ISL_435583   | 2020-02-29      | USA      | Unknown        | B.1     |
| MAG-GVI-93457    | EPI_ISL_447778   | 2020-04-01      | Colombia | Unknown        | B.1.255 |
| Finland_13M82    | EPI_ISL_418399   | 2020-03-13      | Finland  | Unknown        | B.1     |
